# Supplementary material for: Association of Blood-Based Brain Injury Biomarker Concentrations With Outcomes After Pediatric Cardiac Arrest
Source: PubMed Central journal article supplement (PMC9459665; doi:10.1001/jamanetworkopen.2022.30518), 2022-09-08
Supplement: jamanetwopen-e2230518-s002.pdf [file jamanetwopen-e2230518-s002.pdf]

Supplemental Online Content: Nonauthor Collaborators

\*First name, last name, and suffix (if applicable) are required and will appear in PubMed.

| <b>*Group Name(s): Personalizing Outcomes After Child Cardiac Arrest (POCCA) Investigators</b> |                   |                              |                  |                                     |                                          |                                                         |                                                                                            |
|------------------------------------------------------------------------------------------------|-------------------|------------------------------|------------------|-------------------------------------|------------------------------------------|---------------------------------------------------------|--------------------------------------------------------------------------------------------|
| <b>*First Name and Middle Initial(s)</b>                                                       | <b>*Last Name</b> | <b>*Suffix (eg, Jr, III)</b> | Academic Degrees | Institution                         | Location (city, state/province, country) | Role or Contribution, eg, chair, principal investigator | Group (if more than 1 Group listed in the byline) and/or Subgroup (eg, Steering Committee) |
| David                                                                                          | Maloney           |                              | BS               | UPMC Children's Hospital of Pitts   | Pittsburgh, PA, USA                      | Research Coordinator                                    |                                                                                            |
| Pamela                                                                                         | Rubin             |                              | RN               | UPMC Children's Hospital of Pitts   | Pittsburgh, PA, USA                      | Research Coordinator                                    |                                                                                            |
| Beena                                                                                          | Desai             |                              | BS, CCRC         | Children's Healthcare of Atlanta    | Atlanta, GA, USA                         | Research Coordinator                                    |                                                                                            |
| Maureen G.                                                                                     | Richardson        |                              | BSN, RN, C       | Children's Healthcare of Atlanta    | Atlanta, GA, USA                         | Research Coordinator                                    |                                                                                            |
| Cynthia                                                                                        | Bates             |                              | CCRP             | Children's Healthcare of Atlanta    | Atlanta, GA, USA                         | Research Coordinator                                    |                                                                                            |
| Darshana                                                                                       | Parikh            |                              |                  | Children's Hospital of Philadelphia | Philadelphia, PA, USA                    | Research Coordinator                                    |                                                                                            |
| Janice                                                                                         | Prodell           |                              |                  | Children's Hospital of Philadelphia | Philadelphia, PA, USA                    | Research Coordinator                                    |                                                                                            |
| Maddie                                                                                         | Winters           |                              |                  | Children's Hospital of Philadelphia | Philadelphia, PA, USA                    | Research Coordinator                                    |                                                                                            |
| Katherine                                                                                      | Smith             |                              | MPH, BSN         | Children's Hospital of Philadelphia | Philadelphia, PA, USA                    | Research Coordinator                                    |                                                                                            |
| Jeni                                                                                           | Kwok              |                              | JD               | Children's Hospital of Los Angeles  | Los Angeles, CA, USA                     | Research Coordinator                                    |                                                                                            |
| Adriana                                                                                        | Cabrales          |                              | BA               | Children's Hospital of Los Angeles  | Los Angeles, CA, USA                     | Research Coordinator                                    |                                                                                            |
| Ronke                                                                                          | Adewale           |                              |                  | Johns Hopkins Children's Center     | Baltimore, MD, USA                       | Research Coordinator                                    |                                                                                            |
| Pam                                                                                            | Melvin            |                              |                  | Johns Hopkins Children's Center     | Baltimore, MD, USA                       | Research Coordinator                                    |                                                                                            |
| Sadaf                                                                                          | Shad              |                              |                  | Children's Hospital of Wisconsin    | Milwaukee, WI, USA                       | Research Coordinator                                    |                                                                                            |
| Katherine                                                                                      | Siegel            |                              |                  | Children's Hospital of Wisconsin    | Milwaukee, WI, USA                       | Research Coordinator                                    |                                                                                            |

## Supplemental Online Content: Nonauthor Collaborators

\*First name, last name, and suffix (if applicable) are required and will appear in PubMed.

| *First Name and Middle Initial(s) | *Last Name | *Suffix (eg, Jr, III) | Academic Degrees | Institution                      | Location (city, state/province, country) | Role or Contribution, eg, chair, principal investigator | Group (if more than 1 Group listed in the byline) and/or Subgroup (eg, Steering Committee) |
|-----------------------------------|------------|-----------------------|------------------|----------------------------------|------------------------------------------|---------------------------------------------------------|--------------------------------------------------------------------------------------------|
| Katherine                         | Murkowski  |                       |                  | Children's Hospital of Wisconsin | Milwaukee, WI, USA                       | Research Coordinator                                    |                                                                                            |
| Mary                              | Kasch      |                       |                  | Children's Hospital of Wisconsin | Milwaukee, WI, USA                       | Research Coordinator                                    |                                                                                            |
| Josey                             | Hensley    |                       | RN               | Nationwide Children's Hospital   | Columbus, OH, USA                        | Research Coordinator                                    |                                                                                            |
| Lisa                              | Steele     |                       | RN, BSN          | Nationwide Children's Hospital   | Columbus, OH, USA                        | Research Coordinator                                    |                                                                                            |
| Danielle                          | Brown      |                       |                  | Phoenix Children's Hospital      | Phoenix, AZ, USA                         | Research Coordinator                                    |                                                                                            |
| Brian                             | Burrows    |                       |                  | Phoenix Children's Hospital      | Phoenix, AZ, USA                         | Research Coordinator                                    |                                                                                            |
| Lauren                            | Hlivka     |                       |                  | Phoenix Children's Hospital      | Phoenix, AZ, USA                         | Research Coordinator                                    |                                                                                            |
| Deana                             | Rich       |                       |                  | Seattle Children's Hospital      | Seattle, WA, USA                         | Research Coordinator                                    |                                                                                            |
| Amila                             | Tutundzic  |                       |                  | St. Louis Children's Hospital    | St. Louis, MO, USA                       | Research Coordinator                                    |                                                                                            |
| Tina                              | Day        |                       |                  | St. Louis Children's Hospital    | St. Louis, MO, USA                       | Research Coordinator                                    |                                                                                            |
| Lori                              | Barganier  |                       |                  | St. Louis Children's Hospital    | St. Louis, MO, USA                       | Research Coordinator                                    |                                                                                            |
| Ashley                            | Wolfe      |                       |                  | Children's National Hospital     | Washington, DC, USA                      | Research Coordinator                                    |                                                                                            |
| Mackenzie                         | Little     |                       |                  | Children's National Hospital     | Washington, DC, USA                      | Research Coordinator                                    |                                                                                            |
| Elyse                             | Tomanio    |                       |                  | Children's National Hospital     | Washington, DC, USA                      | Research Coordinator                                    |                                                                                            |
| Neha                              | Patel      |                       |                  | Children's National Hospital     | Washington, DC, USA                      | Research Coordinator                                    |                                                                                            |
| Diane                             | Hession    |                       |                  | Children's National Hospital     | Washington, DC, USA                      | Research Coordinator                                    |                                                                                            |

Supplemental Online Content: Nonauthor Collaborators

\*First name, last name, and suffix (if applicable) are required and will appear in PubMed.

| *First Name and Middle Initial(s) | *Last Name  | *Suffix (eg, Jr, III) | Academic Degrees | Institution                       | Location (city, state/province, country) | Role or Contribution, eg, chair, principal investigator | Group (if more than 1 Group listed in the byline) and/or Subgroup (eg, Steering Committee) |
|-----------------------------------|-------------|-----------------------|------------------|-----------------------------------|------------------------------------------|---------------------------------------------------------|--------------------------------------------------------------------------------------------|
| Yamila                            | Sierra      |                       | MPH, CCR         | Children's Hospital of Colorado   | Denver, CO, USA                          | Research Coordinator                                    |                                                                                            |
| Rhonda                            | Jones       |                       |                  | Cincinnati Children's Hospital Me | Cincinnati, OH, USA                      | Research Coordinator                                    |                                                                                            |
| Laura                             | Benken      |                       |                  | Cincinnati Children's Hospital Me | Cincinnati, OH, USA                      | Research Coordinator                                    |                                                                                            |
| Jonathan                          | Elmer       |                       | MD, MS           |                                   | Pittsburgh, PA, USA                      | Collaborator                                            |                                                                                            |
| Subramanian                       | Subramanian |                       | MD               |                                   | Pittsburgh, PA, USA                      | Pediatric Neuroradiologist                              |                                                                                            |
| Srikala                           | Narayanan   |                       | MD               |                                   | Pittsburgh, PA, USA                      | Pediatric Neuroradiologist                              |                                                                                            |
| Nicole                            | Toney       |                       | MPH              |                                   | Pittsburgh, PA, USA                      | Research Coordinator                                    |                                                                                            |
| Julia                             | Wallace     |                       |                  |                                   | Pittsburgh, PA, USA                      | Research Coordinator                                    |                                                                                            |
| Tami                              | Robinson    |                       |                  |                                   | Pittsburgh, PA, USA                      | Data Manager                                            |                                                                                            |
| Andrew                            | Frank       |                       |                  |                                   | San Francisco, CA, USA                   | Imaging storage expert                                  |                                                                                            |
| Stefan                            | Bluml       |                       | PhD              |                                   | Los Angeles, CA, USA                     | MR Spectroscopist                                       |                                                                                            |
| Jessica                           | Wisnowski   |                       | PhD              |                                   | Los Angeles, CA, USA                     | MR Spectroscopist                                       |                                                                                            |
| Keri                              | Feldman     |                       |                  |                                   | Pittsburgh, PA, USA                      | Laboratory technician                                   |                                                                                            |
| Avinash                           | Vemulapalli |                       |                  |                                   | Pittsburgh, PA, USA                      | Data Manager                                            |                                                                                            |
| Linda                             | Ryan        |                       |                  |                                   | Pittsburgh, PA, USA                      | Grants administrator                                    |                                                                                            |
| Scott                             | Szypulski   |                       | MBA              |                                   | Pittsburgh, PA, USA                      | Grants administrator                                    |                                                                                            |
| Christopher                       | Keys        |                       |                  |                                   | Pittsburgh, PA, USA                      | Grants administrator                                    |                                                                                            |
